# Supplementary material for: A long-persistent phosphorescent chemosensor for the detection of TNP based on CaTiO3:Pr3+@SiO2 photoluminescence materials
Source: Royal Society of Chemistry journal article supplement (doi:10.1039/c8ra02665c), 2018-01-01
Supplement: c8ra02665c1.pdf [file c8ra02665c1.pdf]

## Supplementary information

### **A long-persistent phosphorescent chemosensor for the detection of TNP based on $\text{CaTiO}_3:\text{Pr}^{3+}@\text{SiO}_2$ photoluminescence materials**

*Fangfang Li<sup>a</sup>, Xuan Hu<sup>a</sup>, Fengyi Wang<sup>a</sup>, Baozhan Zheng<sup>a</sup>, Juan Du<sup>a\*</sup>, and Dan Xiao<sup>a, b\*</sup>*

*<sup>a</sup> College of Chemistry, Sichuan University, 29 Wangjiang Road, Chengdu 610064,  
PR China.*

*<sup>b</sup> Key Laboratory of Green Chemistry and Technology, Ministry of Education,  
College of Chemistry, Sichuan University, Chengdu, Sichuan 610064, China*

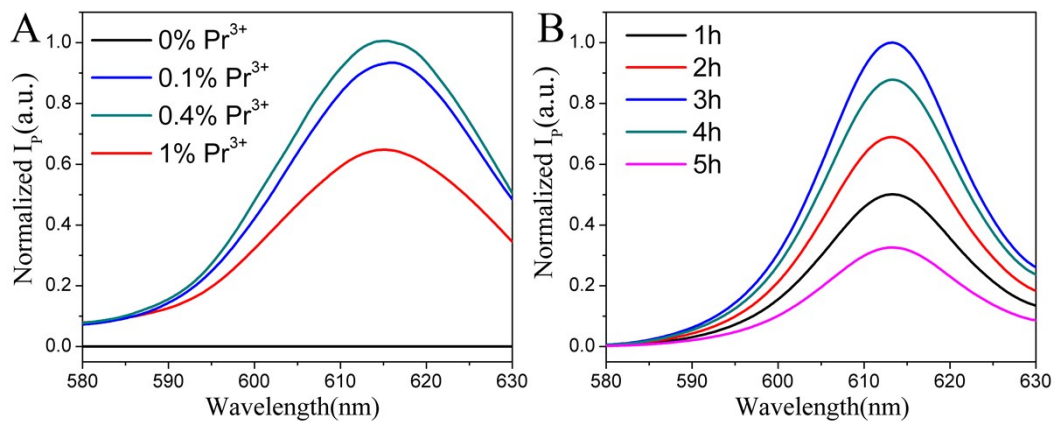

Figure S1. The phosphorescence intensity of (A) different mole ratio of  $\text{Pr}^{3+}$  doped  $\text{CaTiO}_3:\text{Pr}^{3+}$ , 900 °C calcination for 3 h. (B)  $\text{CaTiO}_3:0.4\% \text{Pr}^{3+}$  under different calcination time at 900 °C.

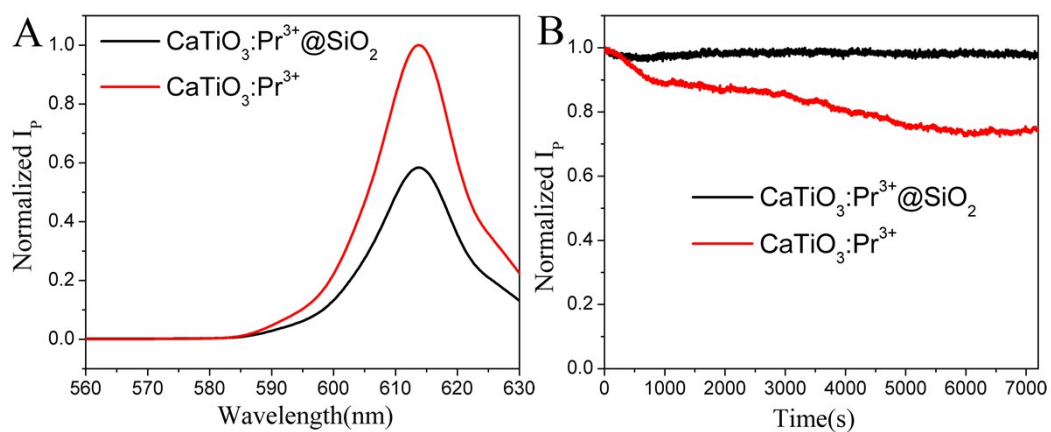

Figure S2. The phosphorescence intensity (A) and the photostability (B) of  $\text{CaTiO}_3:\text{Pr}^{3+}$  before and after coated a silica shell in PBS solution (10 mM, pH = 8,  $\lambda_{\text{ex}} = 315 \text{ nm}$ ).

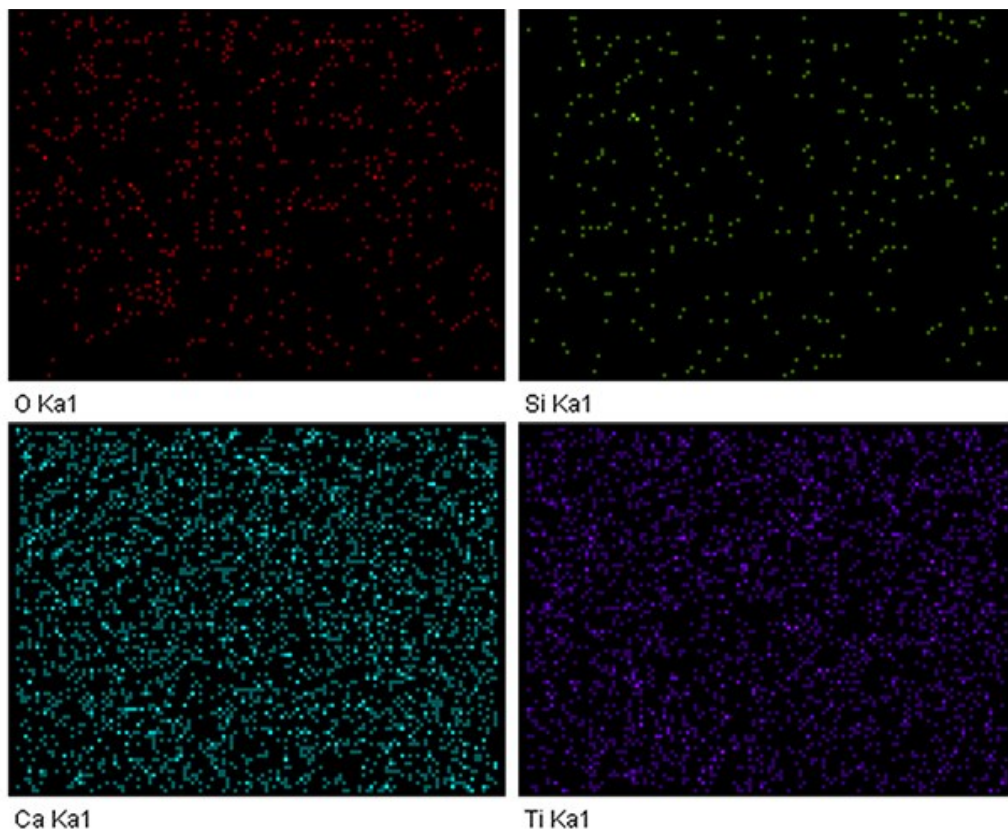

Figure S3. The EDS elemental mapping images of O, Si, Ca and Ti in  $\text{CaTiO}_3:\text{Pr}^{3+}@\text{SiO}_2$ .

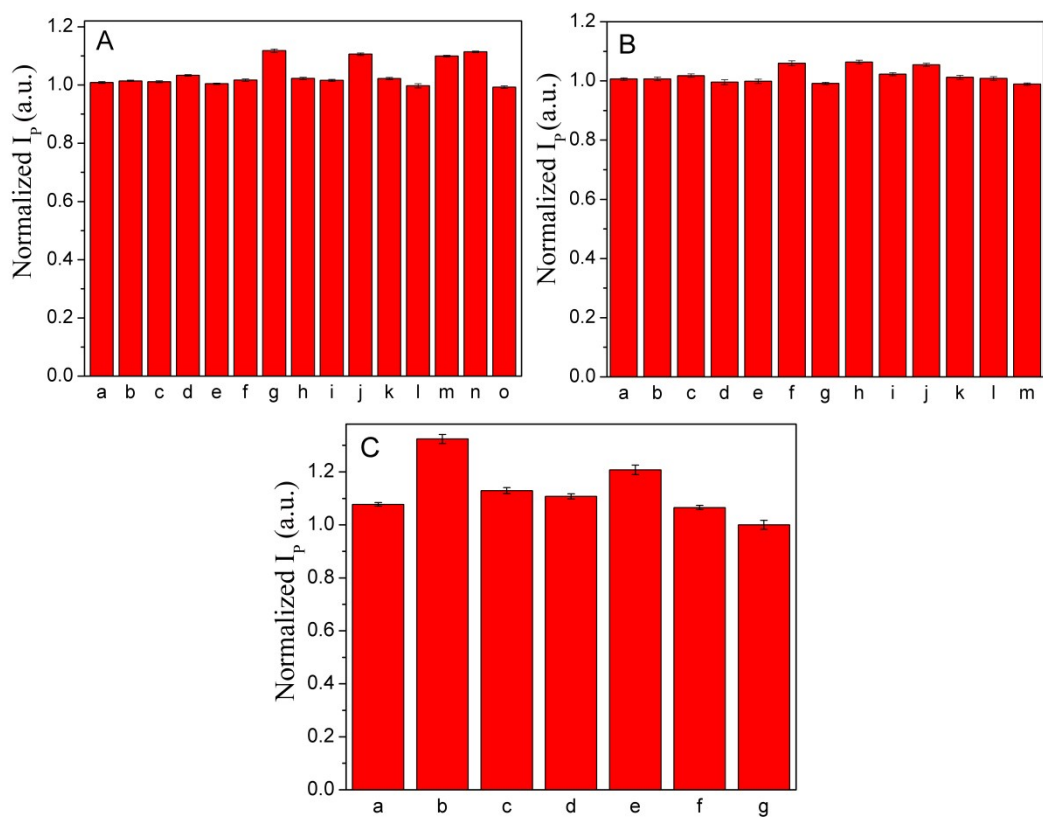

Figure S4. Normalized phosphorescence intensities of  $\text{CaTiO}_3:\text{Pr}^{3+}@\text{SiO}_2$  (30  $\mu\text{g/mL}$ ) to 200  $\mu\text{M}$  TNP in the presence of 200  $\mu\text{M}$  (A): (a)  $\text{Na}^+$ , (b)  $\text{Mg}^{2+}$ , (c)  $\text{Al}^{3+}$ , (d)  $\text{Ca}^{2+}$ , (e)  $\text{Cr}^{3+}$ , (f)  $\text{Mn}^{2+}$ , (g)  $\text{Fe}^{3+}$ , (h)  $\text{Co}^{2+}$ , (i)  $\text{Ni}^{2+}$ , (j)  $\text{Cu}^{2+}$ , (k)  $\text{Zn}^{2+}$ , (l)  $\text{Cd}^{2+}$ , (m)  $\text{Ag}^+$ , (n)  $\text{Hg}^{2+}$ , (o)  $\text{Pb}^{2+}$ . (B): (a)  $\text{F}^-$ , (b)  $\text{Cl}^-$ , (c)  $\text{Br}^-$ , (d)  $\text{I}^-$ , (e)  $\text{CO}_3^{2-}$ , (f) oxalate, (g) citrate, (h)  $\text{NO}_3^-$ , (i)  $\text{NO}_2^-$ , (j)  $\text{SO}_4^{2-}$ , (k)  $\text{SO}_3^{2-}$ , (l)  $\text{S}^{2-}$ , (m)  $\text{PO}_4^{3-}$ . (C): (C): (a) Phenol, (b) NT, (c) DNT, (d) TNT, (e) NP, (f) DNP, (g) Blank.

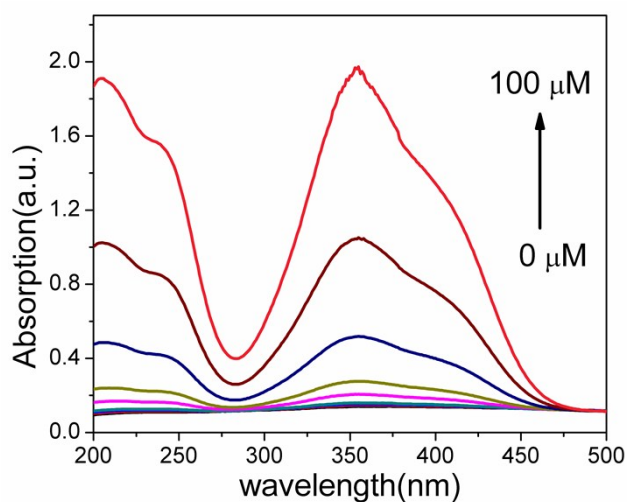

Figure S5. The UV-Vis absorption spectra of  $\text{CaTiO}_3:\text{Pr}^{3+}@\text{SiO}_2$  with different concentrations of TNP (0, 0.5, 1, 2, 5, 10, 20, 50 and 100  $\mu\text{M}$ ) in 10 mM PBS buffer (pH 8.0).

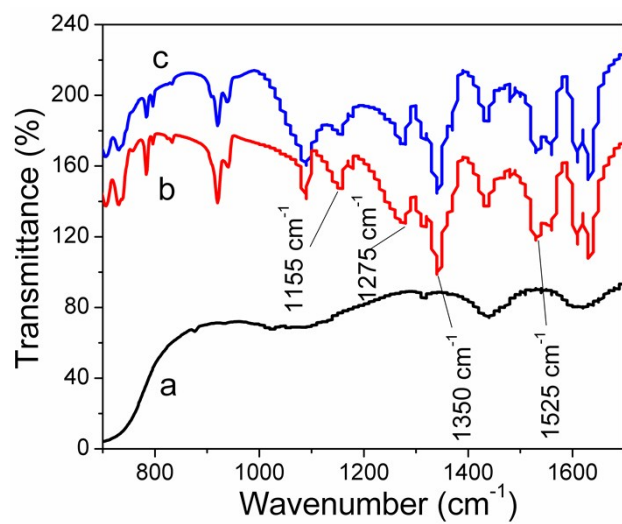

Figure S6. FT-IR spectra of  $\text{CaTiO}_3:\text{Pr}^{3+}@\text{SiO}_2$  (a), TNP (b) and  $\text{CaTiO}_3:\text{Pr}^{3+}@\text{SiO}_2$  and TNP mixture(c)

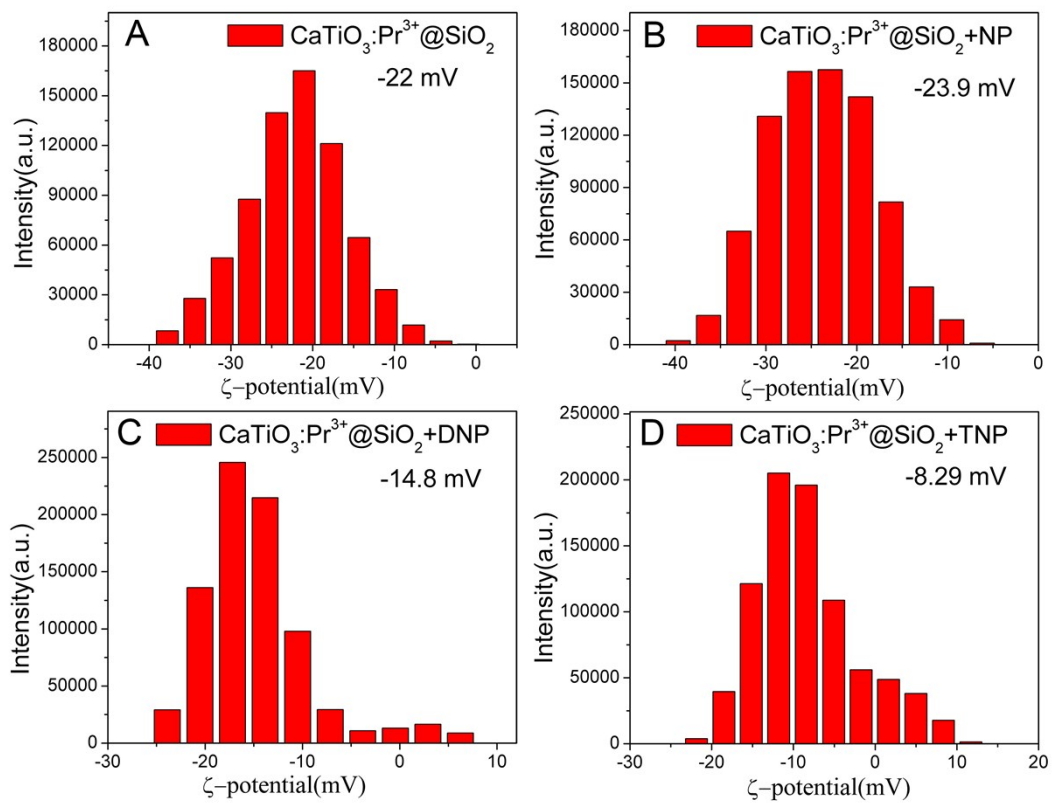

Figure S7.  $\zeta$ -potential of  $\text{CaTiO}_3:\text{Pr}^{3+}@\text{SiO}_2$  (A), and  $\text{CaTiO}_3:\text{Pr}^{3+}@\text{SiO}_2$  with NP (B), DNP (C) and TNP (D)

Table S1. Comparison of different system for TNP detection

| System                                                                             | LOD                                | Linear range                              | $K_{SV} (M^{-1})$   | Reference |
|------------------------------------------------------------------------------------|------------------------------------|-------------------------------------------|---------------------|-----------|
| Molybdenum disulfide (MoS <sub>2</sub> ) quantum dots                              | 95 nM                              | 0.099-36.5 $\mu$ M                        | $4.3 \times 10^4$   | 1         |
| 8-Hydroxyquinoline aluminum (Alq <sub>3</sub> )-based composite nanospheres        | 32.3 $\mu$ g/mL<br>(0.141 $\mu$ M) | 0.05-70 $\mu$ g/mL<br>(0.218-305 $\mu$ M) | N/A                 | 2         |
| 2,6-Diamino pyridine functionalized grapheme oxide (DAP-RGO)                       | 125 nM                             | N/A                                       | $1.322 \times 10^5$ | 3         |
| Ratiometric NIR fluorescent probe DNSA-SQ                                          | 70 nM                              | 5-100 $\mu$ M                             | N/A                 | 4         |
| 1,8-Naphthalimide - anthracene (Nph-An)                                            | 0.47 $\mu$ M                       | N/A                                       | $7.0 \times 10^4$   | 5         |
| Nitrogen doped graphene quantum dots                                               | 0.3 $\mu$ M                        | 1-60 $\mu$ M                              | N/A                 | 6         |
| CaTiO <sub>3</sub> :Pr <sup>3+</sup> @SiO <sub>2</sub> photoluminescence materials | 20.6 nM                            | 0.5-100 $\mu$ M                           | $1.25 \times 10^4$  | This work |

Table S2. Determination of TNP in pond water samples

| Samples | TNP               | Proposed method   |          |                   |           |
|---------|-------------------|-------------------|----------|-------------------|-----------|
|         | Added             | Found             | Recovery | SD (n=3)          | RSD (n=3) |
|         | ( $\mu\text{M}$ ) | ( $\mu\text{M}$ ) | (%)      | ( $\mu\text{M}$ ) | (%)       |
| 1       | 20.00             | 20.32             | 101.60   | 0.16              | 0.79      |
| 2       | 50.00             | 49.67             | 99.34    | 0.07              | 0.14      |
| 3       | 80.00             | 80.26             | 100.33   | 0.48              | 0.56      |

## References

- 1 Y. Wang, Y. Ni, *Anal. Chem.*, 2014, **86**, 7463-7470.
- 2 Y. Ma, H. Li, S. Peng, L. Wang, *Anal. Chem.*, 2012, **84**, 8415-8421.
- 3 D. Dinda, A. Gupta, B. K. Shaw, S. Sadhu, S. K. Saha, *Acs Appl. Mater. Inter.*, 2014, **6**, 10722-10728.
- 4 Y. Xu, B. Li, W. Li, J. Zhao, S. Sun, Y. Pang, *Chem. Commun.*, 2013, **49**, 4764-4766.
- 5 H. Ma, C. He, X. Li, O. Ablikim, S. Zhang, M. Zhang, *Sensor. Actuat .B Chem.*, 2016, **230**, 746-752.
- 6 L. Lin, M. Rong, S. Lu, X. Song, Y. Zhong, J. Yan, Y. Wang, X. Chen, *Nanoscale*, 2015, **7**, 1872-1878.
